# Supplementary material
Source: PubMed Central journal article supplement (PMC7032051)

# Figure S1

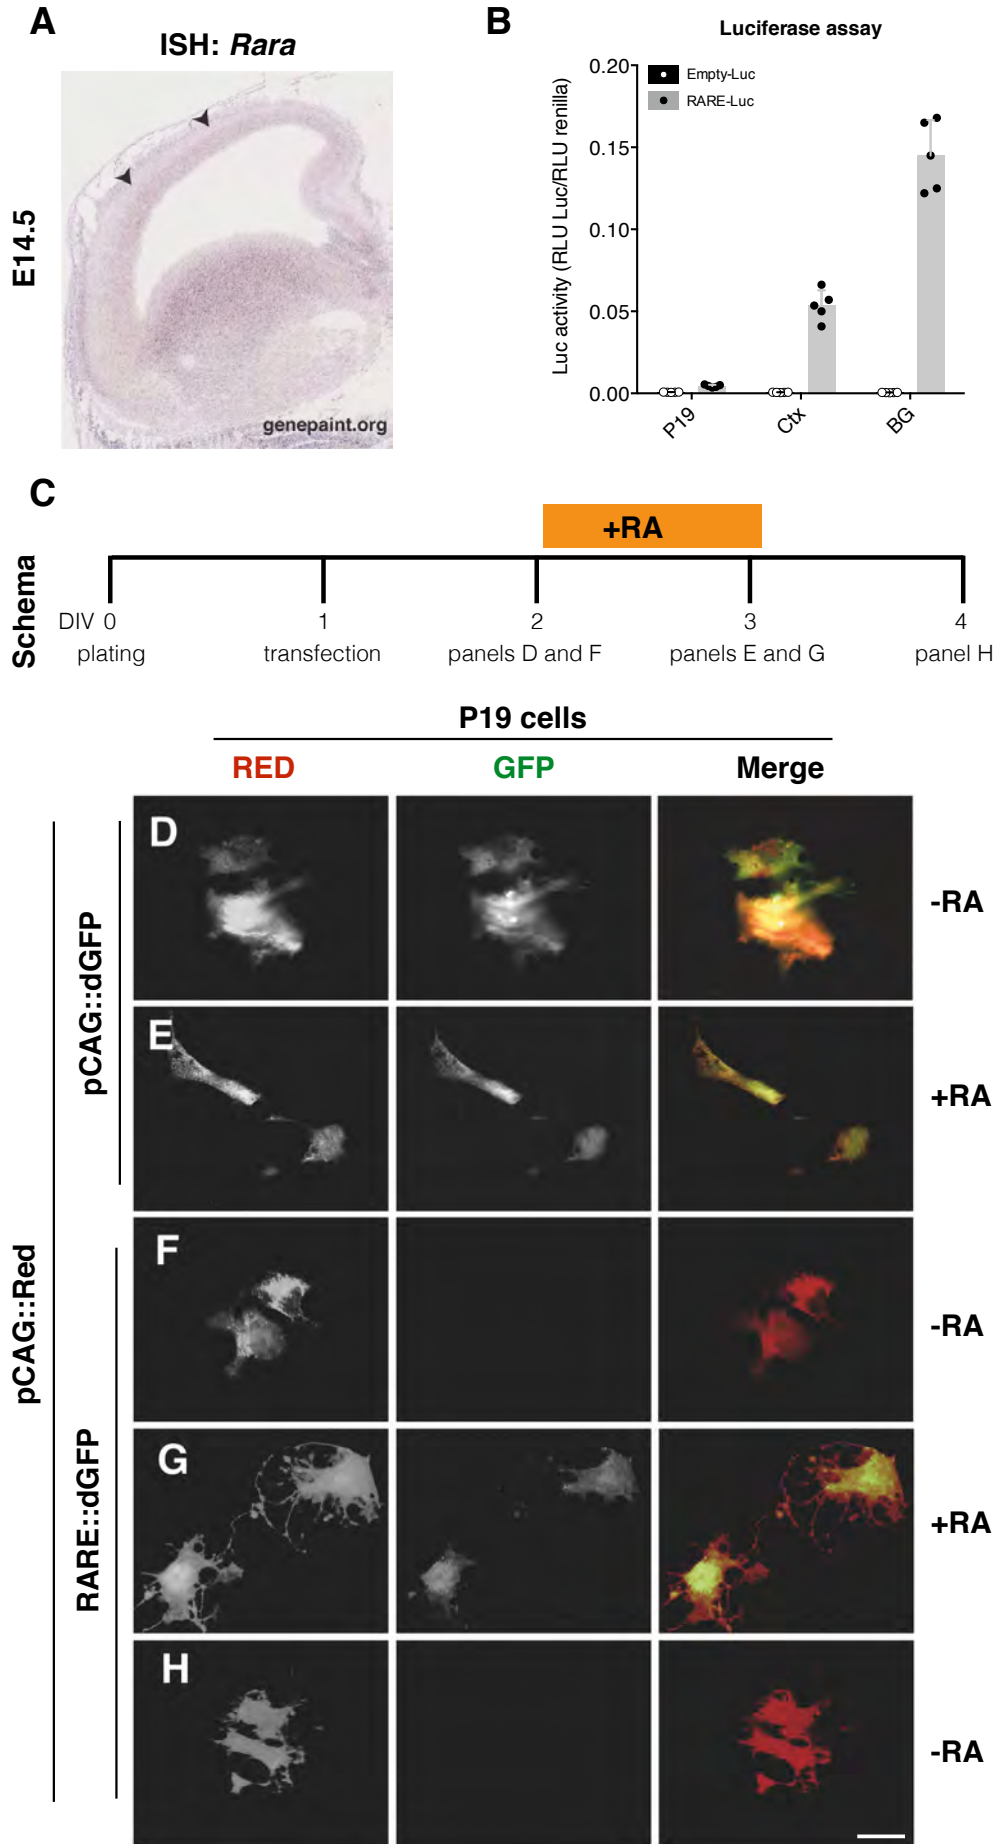

# Figure S2

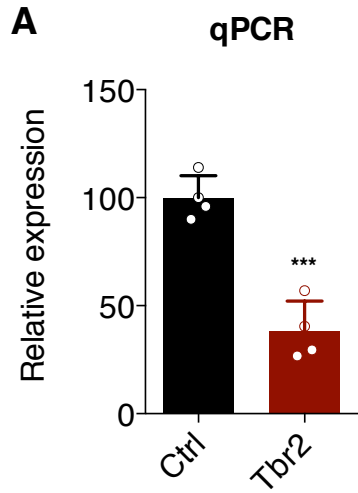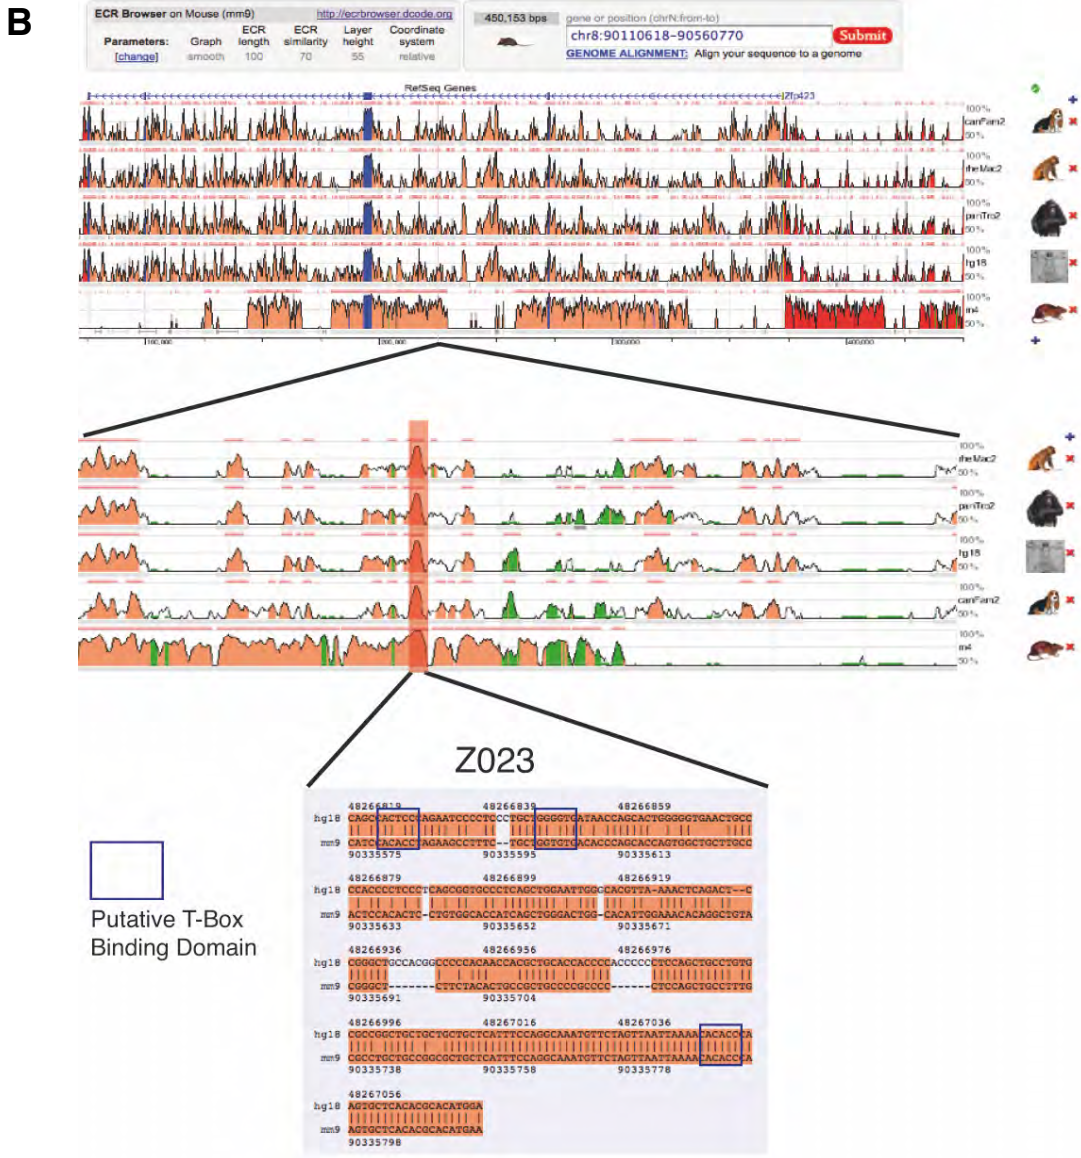

Figure S3

DAPI/TBR2

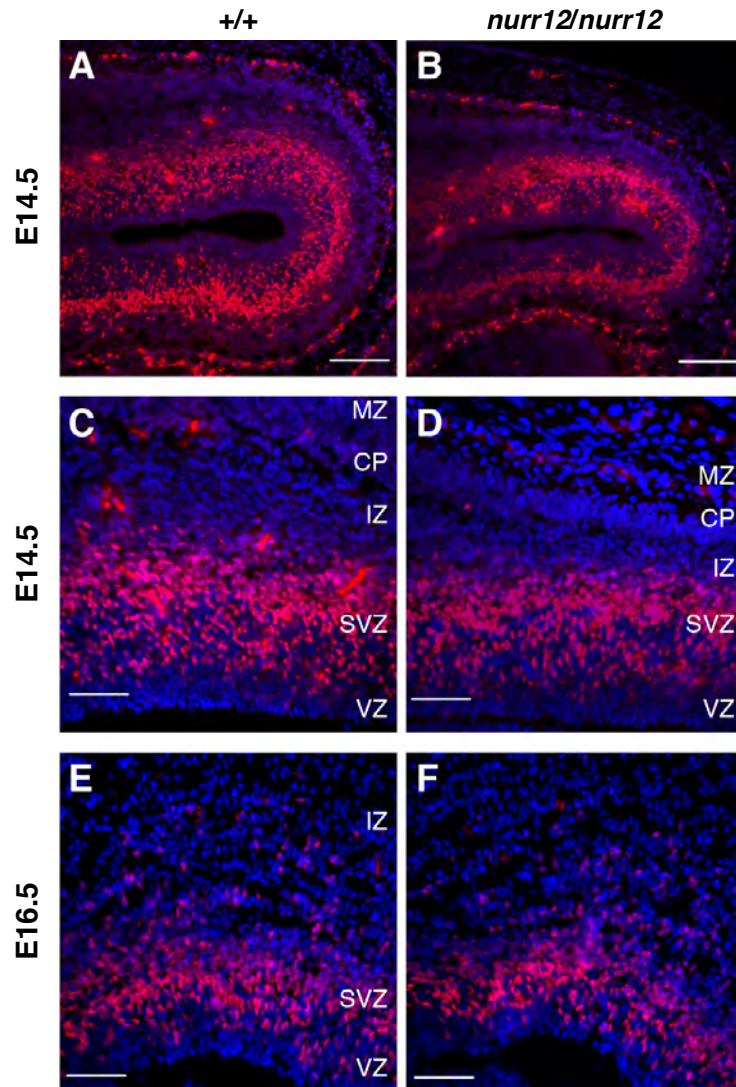

# Figure S4

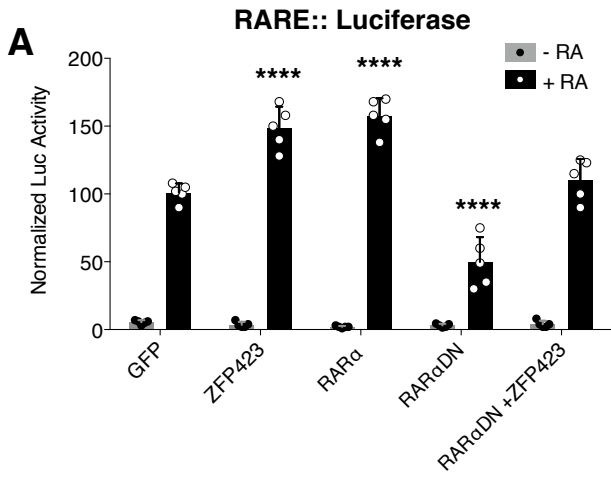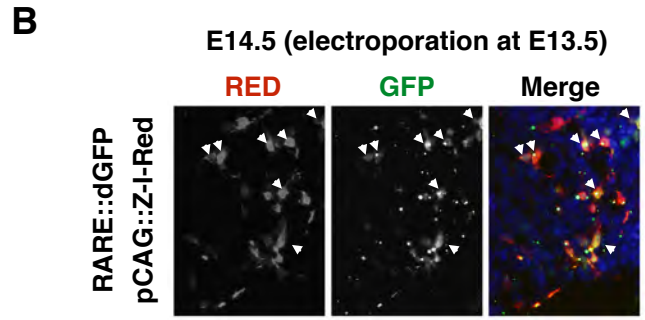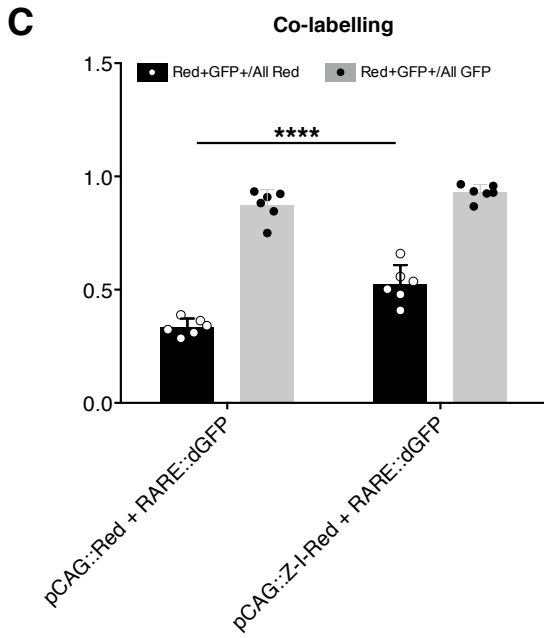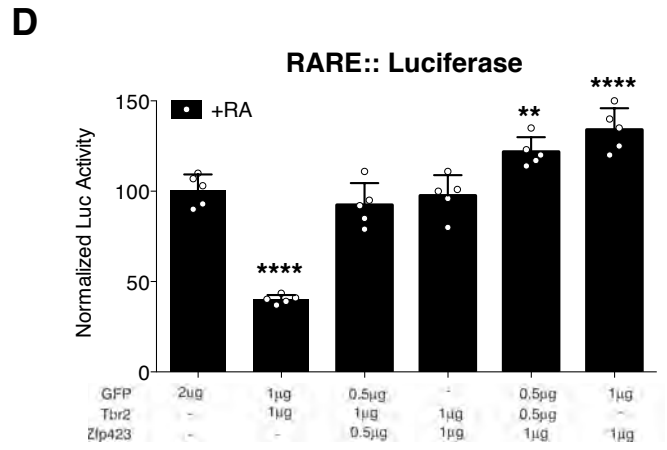

# Figure S5

E1. E13.5, Analysis E15.5

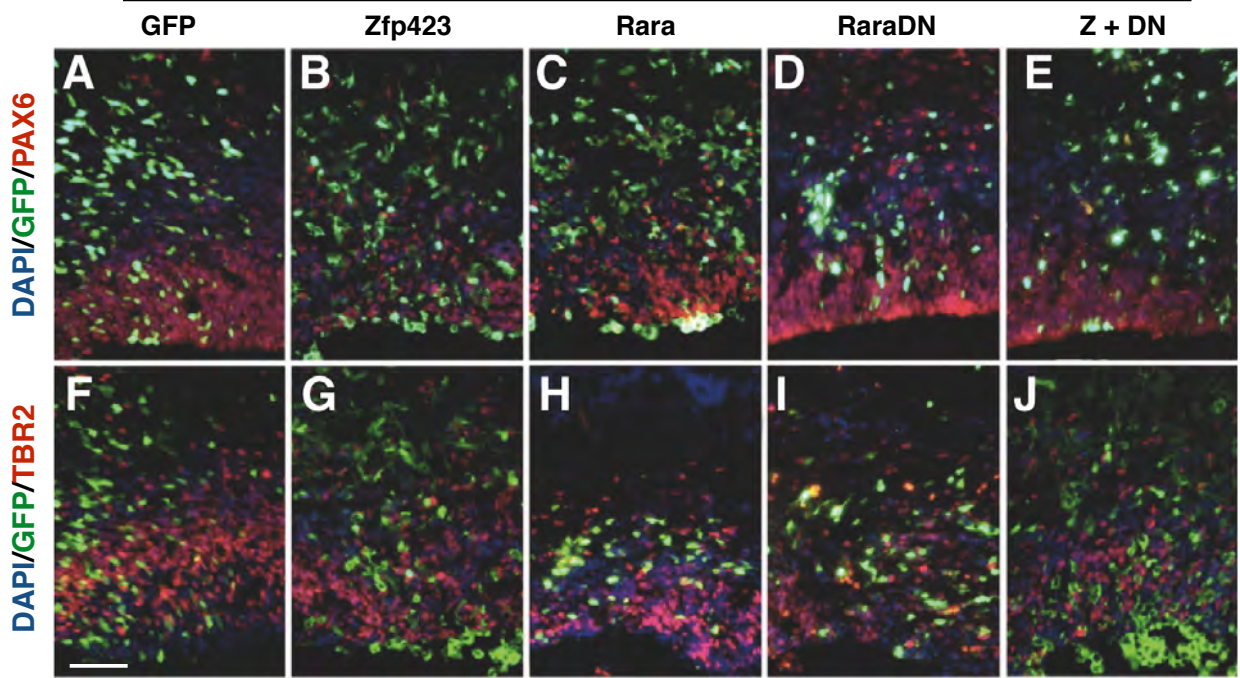

# Figure S6

E1. E13.5, Analysis E15.5

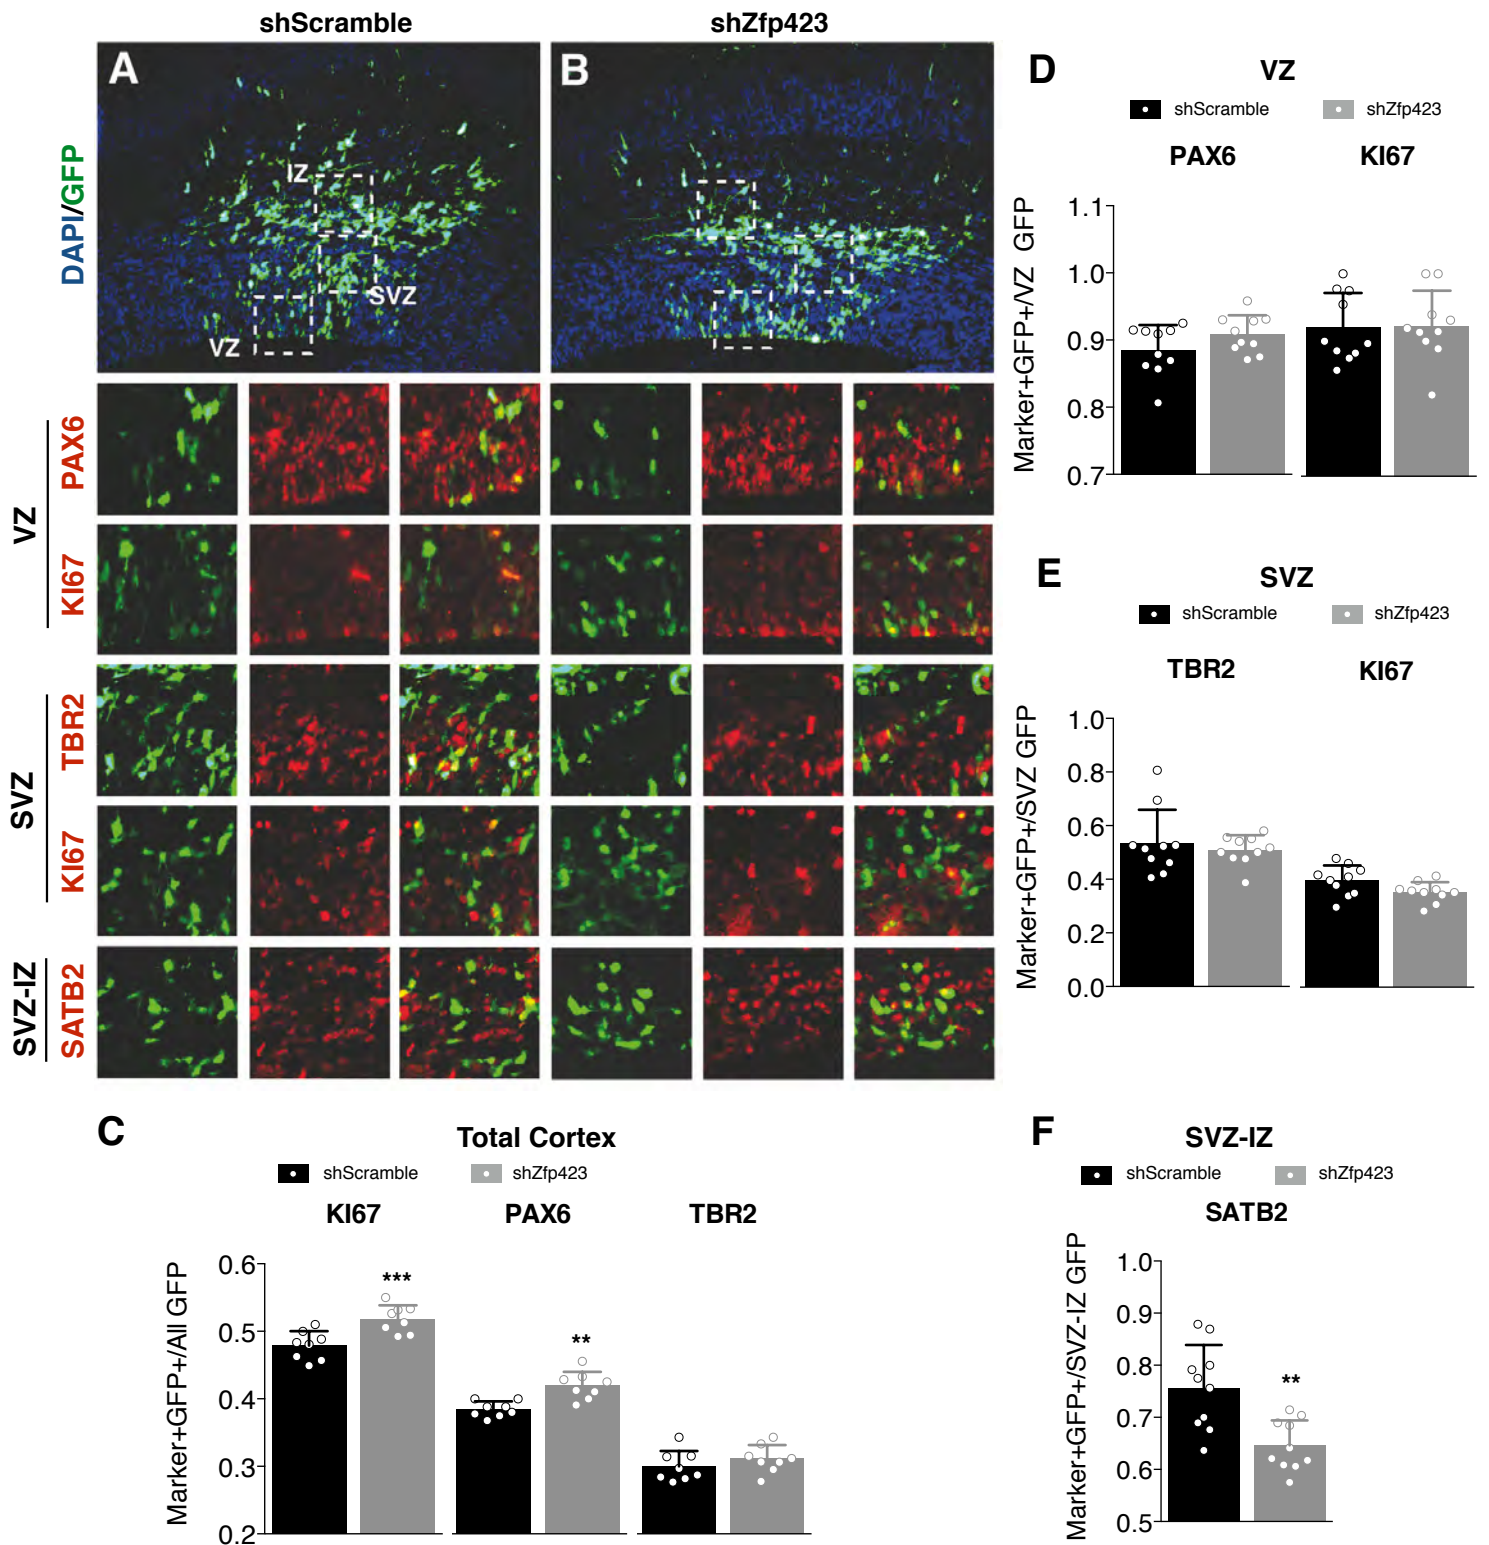

# Figure S7

E1. E13.5, Analysis E15.5

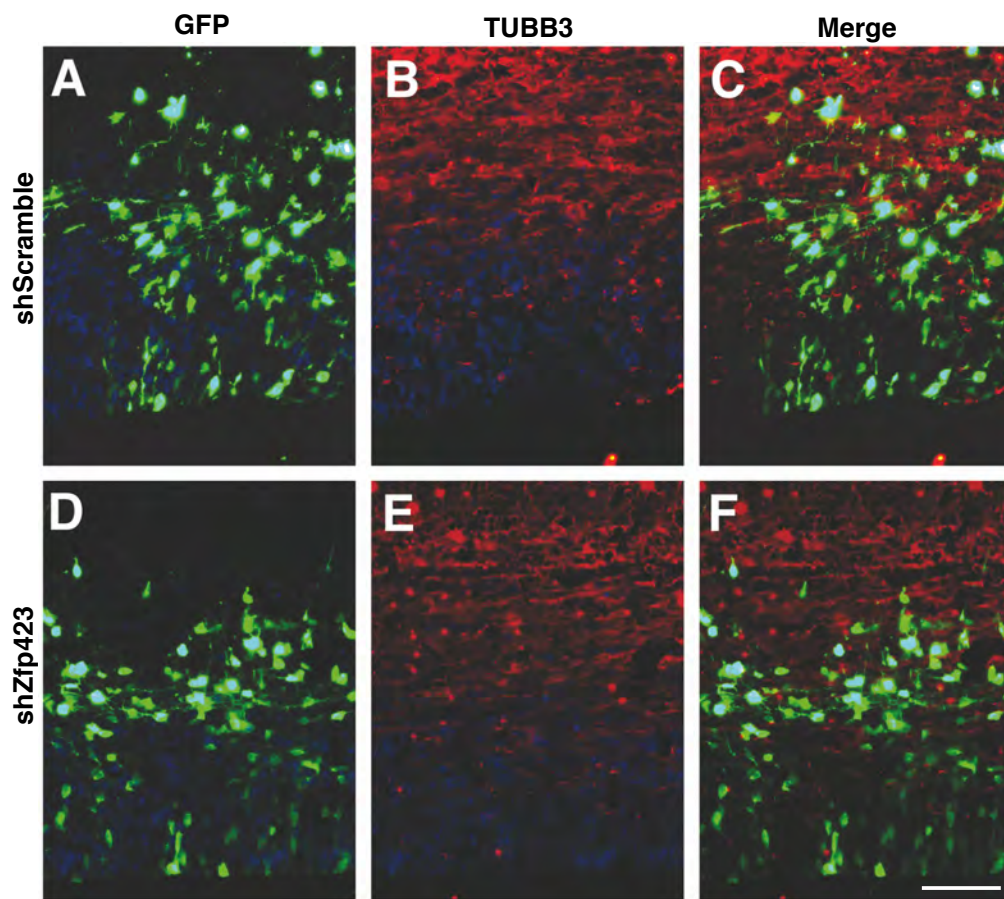

# Figure S8

E1. E13.5, Analysis E17.5

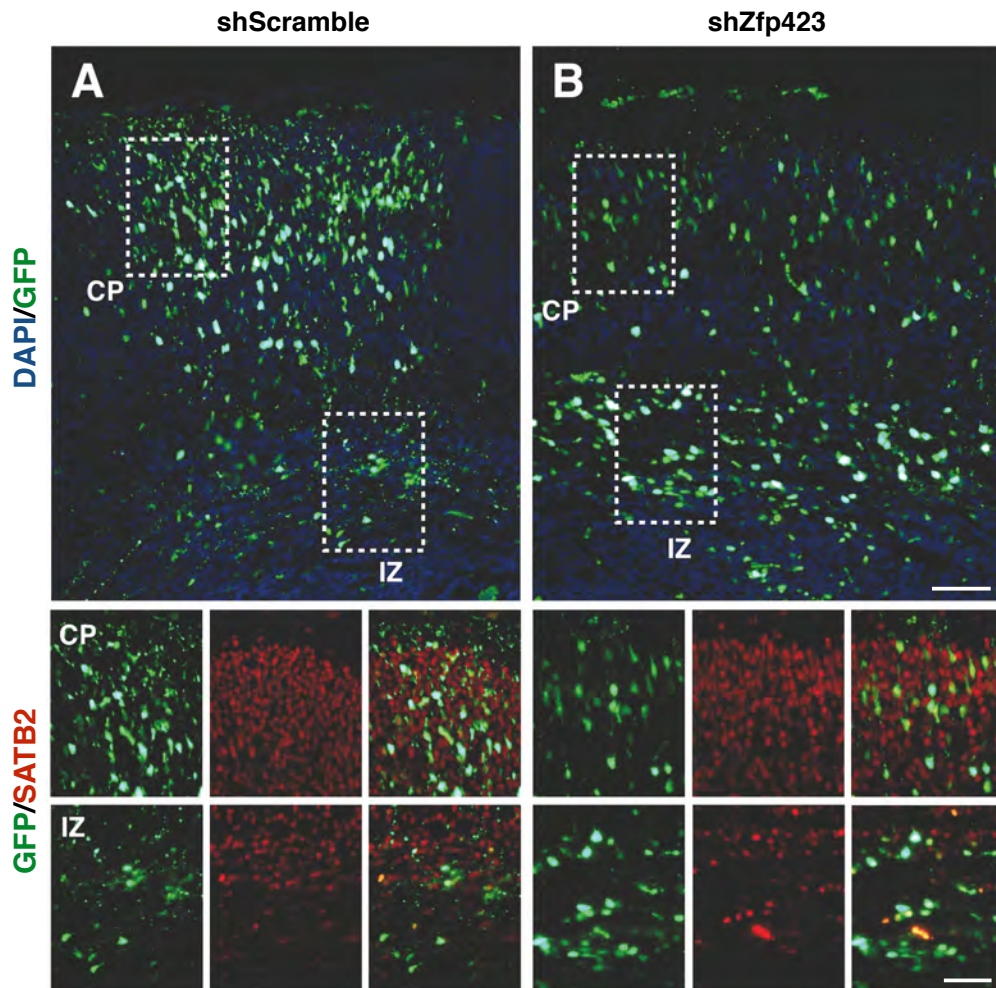

Supplement: NIHMS1002344-supplement-Supplemental_Figures.pdf [file NIHMS1002344-supplement-Supplemental_Figures.pdf]
